# Supplementary material
Source: publisher figshare collection journal article supplement (https://sage.figshare.com/ndownloader/files/17823143)

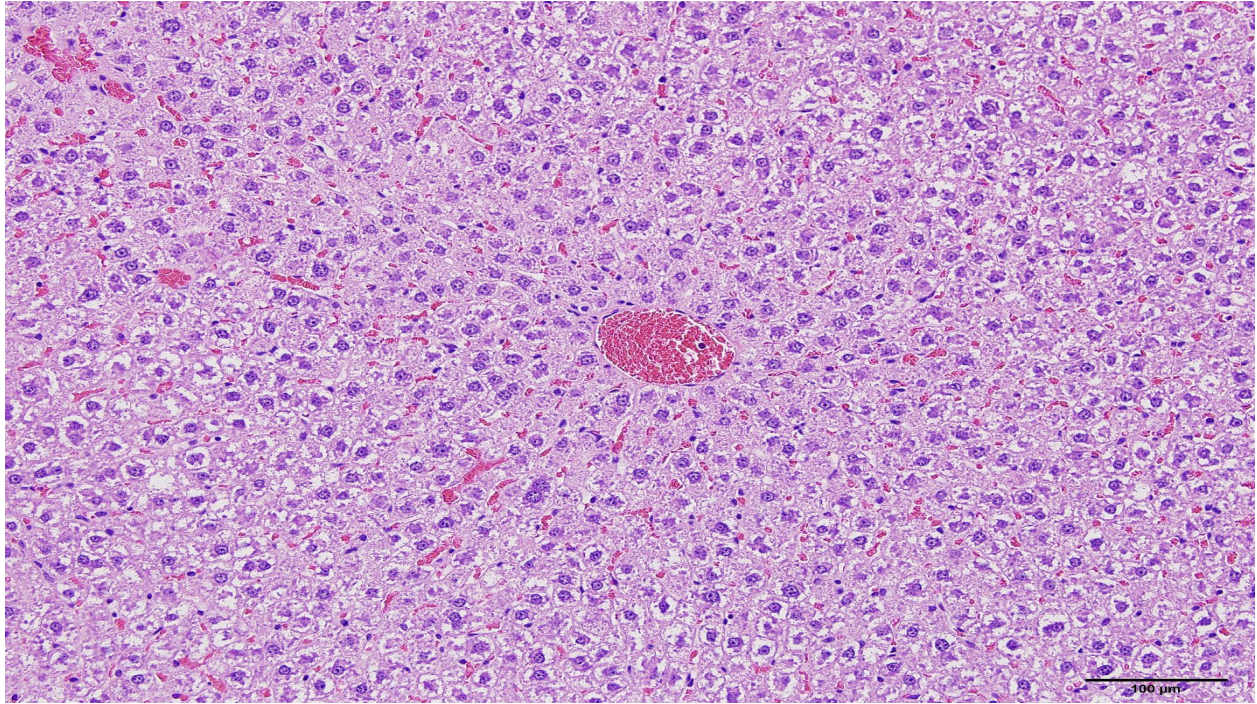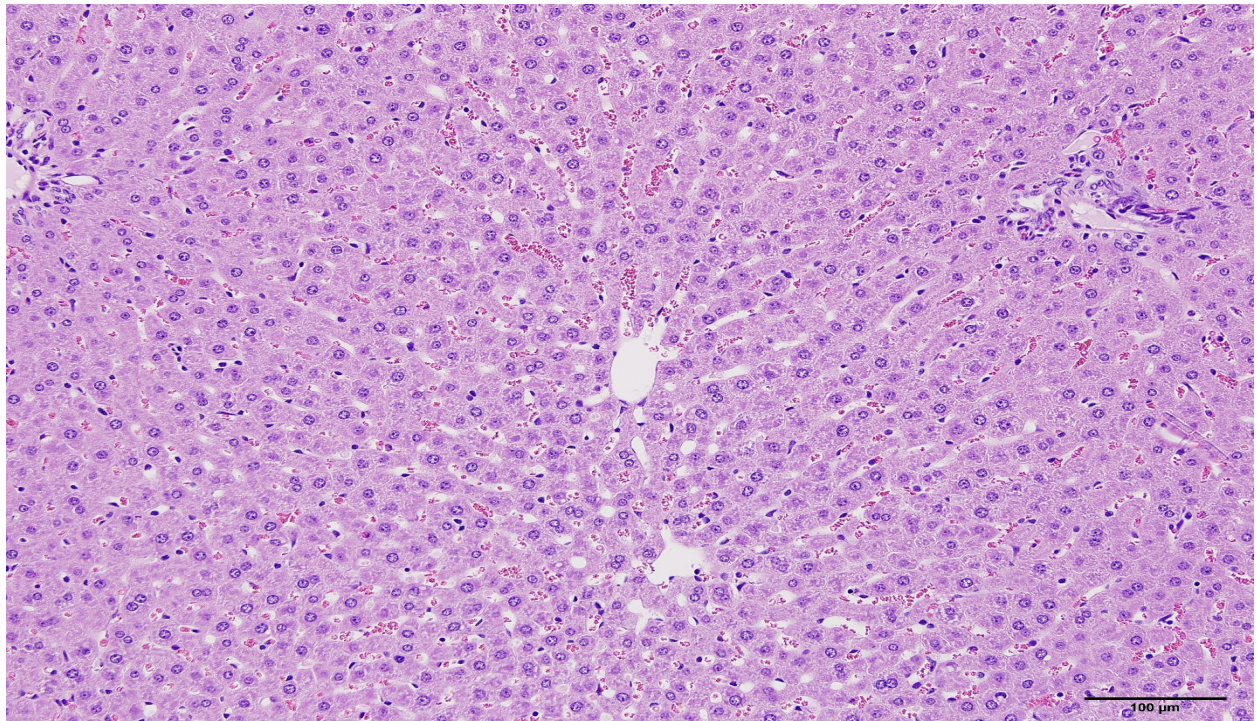

H & E of Control Animals.



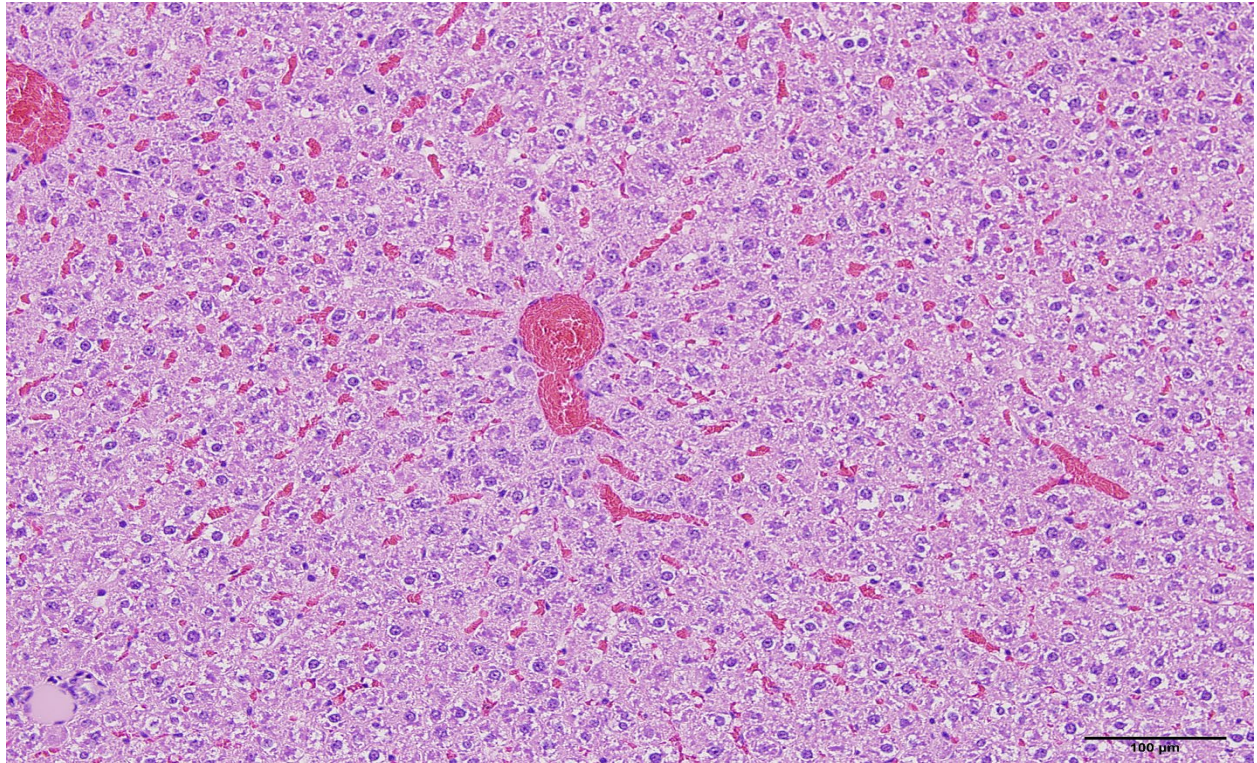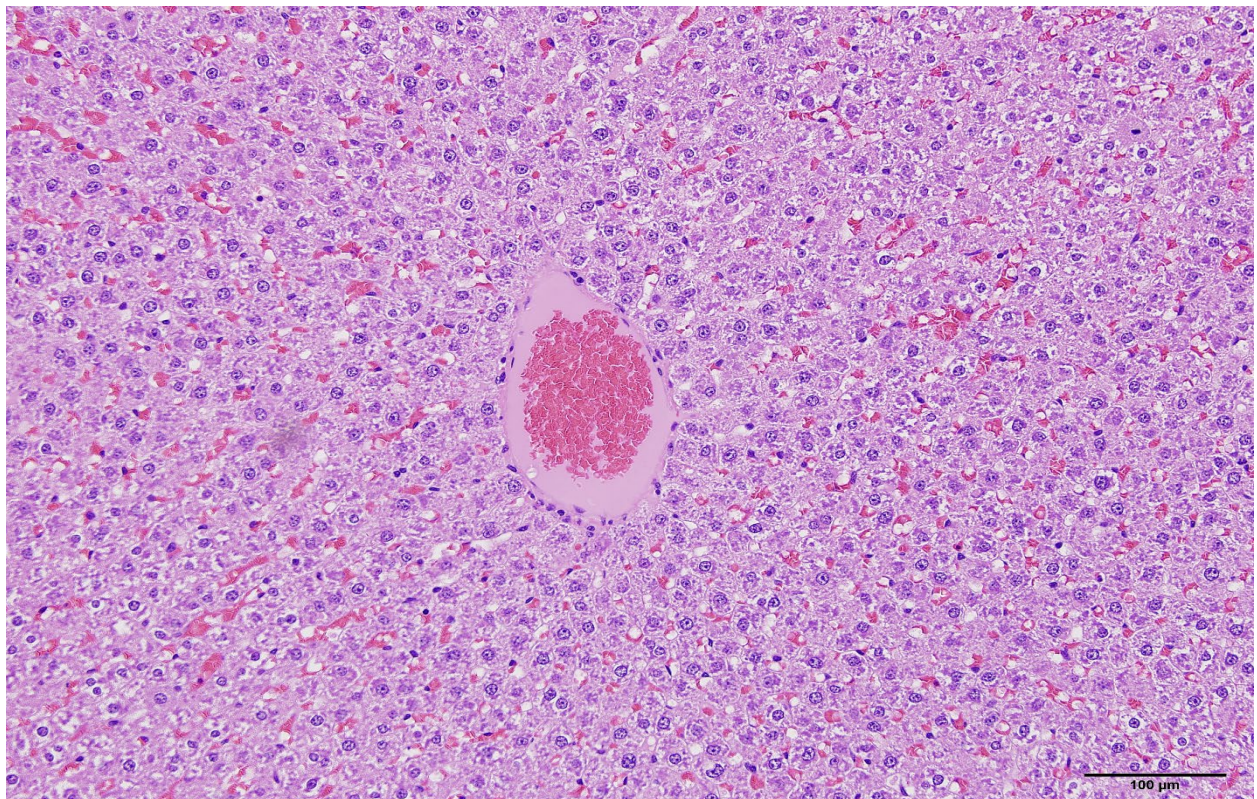

H & E of Low Dose Animals.



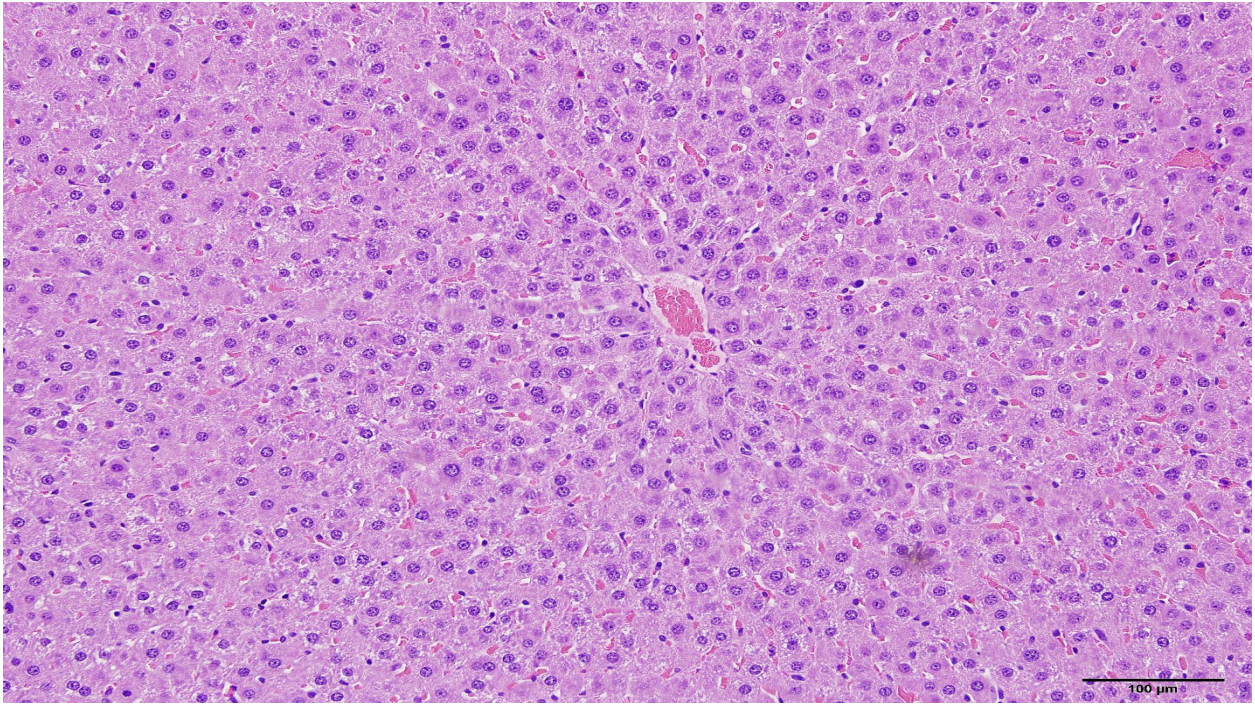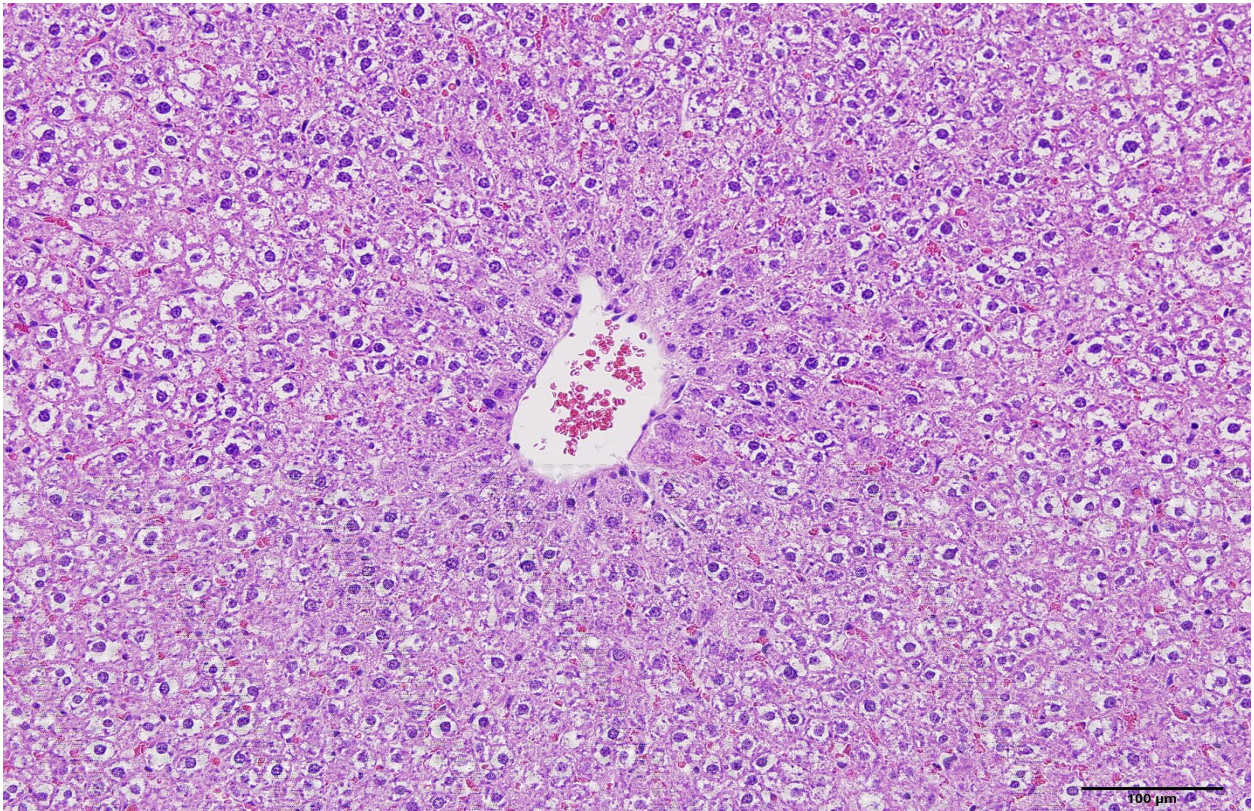

H & E of High Dose Animals.

Supplement: Supplementary file 1 [file 17823143]
